# Supplementary material for: Postoperative long‑term outcomes of acute normovolemic hemodilution in pancreatic cancer: A propensity score matching analysis
Source: PubMed Central journal article supplement — Oncol Lett. 2024 Mar 27;27(5):236. doi: 10.3892/ol.2024.14369 (PMC11005082; doi:10.3892/ol.2024.14369), 2024-03-27
Supplement: Supplementary_Data.pdf [file Supplementary_Data.pdf]

**Table S1.** Clinicopathological characteristics predicting RFS and DSS after propensity score matching.

| Characteristics                    | No. | 5-year RFS, % | MST, months | Univariate analysis |             |         | Multivariate analysis |        |         | 5-year DSS, % | MST, months | Univariate analysis |             |         | Multivariate analysis |             |         |
|------------------------------------|-----|---------------|-------------|---------------------|-------------|---------|-----------------------|--------|---------|---------------|-------------|---------------------|-------------|---------|-----------------------|-------------|---------|
|                                    |     |               |             | RR                  | 95% CI      | P-value | RR                    | 95% CI | P-value |               |             | RR                  | 95% CI      | P-value | RR                    | 95% CI      | P-value |
| Sex                                |     |               |             | 0.734               | 0.421-1.281 | 0.274   |                       |        |         |               |             | 0.694               | 0.378-1.275 | 0.237   |                       |             |         |
| Male                               | 40  | 21.9          | 12.4        |                     |             |         |                       |        | 30.7    | 32.1          |             |                     |             |         |                       |             |         |
| Female                             | 30  | 25.5          | 21.6        |                     |             |         |                       |        | 42.1    | 42.6          |             |                     |             |         |                       |             |         |
| Age, years                         |     |               |             | 1.249               | 0.723-2.158 | 0.424   |                       |        |         |               |             | 1.217               | 0.673-2.202 | 0.515   |                       |             |         |
| <69                                | 39  | 26.6          | 18.1        |                     |             |         |                       |        | 39.2    | 42.6          |             |                     |             |         |                       |             |         |
| ≥69                                | 31  | 20.0          | 12.4        |                     |             |         |                       |        | 30.7    | 36.5          |             |                     |             |         |                       |             |         |
| Body mass index, kg/m <sup>2</sup> |     |               |             | 1.194               | 0.691-2.061 | 0.523   |                       |        |         |               |             | 0.979               | 0.542-1.770 | 0.945   |                       |             |         |
| <22.3                              | 37  | 28.8          | 17.9        |                     |             |         |                       |        | 34.9    | 36.5          |             |                     |             |         |                       |             |         |
| ≥22.3                              | 33  | 18.2          | 13.0        |                     |             |         |                       |        | 35.1    | 42.6          |             |                     |             |         |                       |             |         |
| Preoperative biliary drainage      |     |               |             | 1.189               | 0.685-2.061 | 0.537   |                       |        |         |               |             | 1.734               | 0.954-3.151 | 0.067   |                       |             |         |
| No                                 | 38  | 22.8          | 21.2        |                     |             |         |                       |        | 43.2    | 50.5          |             |                     |             |         |                       |             |         |
| Yes                                | 32  | 25.8          | 12.4        |                     |             |         |                       |        | 25.6    | 27.8          |             |                     |             |         |                       |             |         |
| Hemoglobin, g/dl                   |     |               |             | 1.125               | 0.651-1.943 | 0.672   |                       |        |         |               |             | 0.974               | 0.539-1.761 | 0.931   |                       |             |         |
| <12.9                              | 36  | 24.4          | 15.2        |                     |             |         |                       |        | 36.1    | 33.2          |             |                     |             |         |                       |             |         |
| ≥12.9                              | 34  | 24.3          | 12.4        |                     |             |         |                       |        | 33.6    | 42.6          |             |                     |             |         |                       |             |         |
| CRP, mg/dl                         |     |               |             | 1.572               | 0.905-2.731 | 0.105   |                       |        |         |               |             | 1.917               | 1.049-3.503 | 0.031   | 1.52                  | 0.807-2.869 | 0.195   |
| <0.20                              | 35  | 28.3          | 23.8        |                     |             |         |                       |        | 45.7    | 50.5          |             |                     |             |         |                       |             |         |
| ≥0.20                              | 35  | 20.6          | 12.4        |                     |             |         |                       |        | 23.4    | 27.8          |             |                     |             |         |                       |             |         |

|                           |    |      |      |       |                 |       |  |  |  |      |       |                 |                 |       |  |  |
|---------------------------|----|------|------|-------|-----------------|-------|--|--|--|------|-------|-----------------|-----------------|-------|--|--|
| Albumin, g/dl             |    |      |      | 0.671 | 0.379-<br>1.188 | 0.168 |  |  |  |      | 0.663 | 0.358-<br>1.227 | 0.187           |       |  |  |
| <3.9                      | 40 | 13.9 | 13.0 |       |                 |       |  |  |  | 27.2 | 33.2  |                 |                 |       |  |  |
| ≥3.9                      | 30 | 36.1 | 21.2 |       |                 |       |  |  |  | 45.9 | 50.0  |                 |                 |       |  |  |
| Hemoglobin                |    |      |      | 1.240 | 0.692-<br>2.221 | 0.281 |  |  |  |      |       | 1.183           | 0.625-<br>2.239 | 0.340 |  |  |
| A1c, %                    |    |      |      |       |                 |       |  |  |  |      |       |                 |                 |       |  |  |
| <5.8                      | 33 | 30.9 | 17.9 |       |                 |       |  |  |  | 42.2 | 43.5  |                 |                 |       |  |  |
| ≥5.8                      | 37 | 16.9 | 12.7 |       |                 |       |  |  |  | 28.0 | 38.1  |                 |                 |       |  |  |
| Creatinine, mg/dl         |    |      |      | 0.915 | 0.530-<br>1.579 | 0.748 |  |  |  |      |       | 0.845           | 0.465-<br>1.534 | 0.579 |  |  |
| <0.67                     | 37 | 20.2 | 12.3 |       |                 |       |  |  |  | 29.1 | 41.6  |                 |                 |       |  |  |
| ≥0.67                     | 33 | 26.9 | 17.9 |       |                 |       |  |  |  | 41.9 | 36.5  |                 |                 |       |  |  |
| AST, U/l                  |    |      |      | 1.445 | 0.836-<br>2.498 | 0.185 |  |  |  |      |       | 1.440           | 0.795-<br>2.608 | 0.226 |  |  |
| <32                       | 36 | 28.8 | 21.6 |       |                 |       |  |  |  | 41.6 | 50.0  |                 |                 |       |  |  |
| ≥32                       | 34 | 17.7 | 12.1 |       |                 |       |  |  |  | 29.1 | 33.2  |                 |                 |       |  |  |
| ALT, U/l                  |    |      |      | 1.118 | 0.647-<br>1.931 | 0.690 |  |  |  |      |       | 1.355           | 0.749-<br>2.452 | 0.313 |  |  |
| <45                       | 36 | 24.7 | 21.2 |       |                 |       |  |  |  | 40.4 | 43.5  |                 |                 |       |  |  |
| ≥45                       | 34 | 22.7 | 12.4 |       |                 |       |  |  |  | 29.4 | 33.2  |                 |                 |       |  |  |
| Total bilirubin,<br>mg/dl |    |      |      | 1.176 | 0.681-<br>2.031 | 0.559 |  |  |  |      |       | 1.475           | 0.814-<br>2.672 | 0.197 |  |  |
| <0.8                      | 36 | 22.5 | 21.2 |       |                 |       |  |  |  | 41.0 | 50.0  |                 |                 |       |  |  |
| ≥0.8                      | 34 | 23.4 | 12.3 |       |                 |       |  |  |  | 28.8 | 28.6  |                 |                 |       |  |  |
| CA19-9, U/ml              |    |      |      | 1.401 | 0.813-<br>2.416 | 0.222 |  |  |  |      |       | 1.056           | 0.584-<br>1.907 | 0.857 |  |  |
| <73                       | 35 | 27.5 | 20.3 |       |                 |       |  |  |  | 36.3 | 41.6  |                 |                 |       |  |  |
| ≥73                       | 35 | 19.9 | 12.1 |       |                 |       |  |  |  | 34.7 | 38.6  |                 |                 |       |  |  |
| CEA, ng/ml                |    |      |      | 0.919 | 0.532-          | 0.762 |  |  |  |      |       | 0.896           | 0.494-          | 0.718 |  |  |

|                       |    |      |      |       |             |       |           |             |       |      |      |       |              |       |           |             |       |
|-----------------------|----|------|------|-------|-------------|-------|-----------|-------------|-------|------|------|-------|--------------|-------|-----------|-------------|-------|
|                       |    |      |      |       | 1.587       |       |           |             |       |      |      | 1.624 |              |       |           |             |       |
| <2.5                  | 37 | 21.0 | 15.2 |       |             |       |           |             |       | 32.9 | 36.5 |       |              |       |           |             |       |
| ≥2.5                  | 33 | 26.7 | 18.1 |       |             |       |           |             |       | 37.6 | 44.4 |       |              |       |           |             |       |
| Tumor size, mm        |    |      |      | 2.133 | 1.228-3.704 | 0.006 | 1.5<br>15 | 0.832-2.757 | 0.174 |      |      | 1.842 | 1.013-3.350  | 0.042 | 1.05<br>2 | 0.542-2.042 | 0.880 |
| <28                   | 37 | 35.5 | 21.6 |       |             |       |           |             |       | 47.5 | 50.5 |       |              |       |           |             |       |
| ≥28                   | 33 | 10.6 | 11.1 |       |             |       |           |             |       | 22.5 | 36.5 |       |              |       |           |             |       |
| UICC T category       |    |      |      | 3.060 | 1.213-7.718 | 0.013 | 2.0<br>26 | 0.741-5.538 | 0.169 |      |      | 4.054 | 1.252-13.120 | 0.011 | 2.21<br>6 | 0.634-7.743 | 0.212 |
| T1                    | 11 | 53.0 | 55.0 |       |             |       |           |             |       | 70.7 | 59.6 |       |              |       |           |             |       |
| T2-3                  | 59 | 18.1 | 12.4 |       |             |       |           |             |       | 28.6 | 33.0 |       |              |       |           |             |       |
| UICC N category       |    |      |      | 2.150 | 1.215-3.806 | 0.007 | 1.6<br>82 | 0.929-3.047 | 0.086 |      |      | 2.331 | 1.233-4.405  | 0.007 | 3.33<br>3 | 1.474-7.538 | 0.004 |
| N0                    | 30 | 35.4 | 24.6 |       |             |       |           |             |       | 51.0 | 50.0 |       |              |       |           |             |       |
| N1-2                  | 40 | 14.4 | 12.1 |       |             |       |           |             |       | 23.6 | 27.3 |       |              |       |           |             |       |
| UICC M category       |    |      |      | 1.743 | 0.814-3.730 | 0.147 |           |             |       |      |      | 1.442 | 0.669-3.107  | 0.348 |           |             |       |
| M0                    | 61 | 25.4 | 17.9 |       |             |       |           |             |       | 39.5 | 41.6 |       |              |       |           |             |       |
| M1 <sup>a</sup>       | 9  | 11.1 | 8.8  |       |             |       |           |             |       | 0    | 36.5 |       |              |       |           |             |       |
| R0 resection          |    |      |      | 1.260 | 0.501-3.172 | 0.893 |           |             |       |      |      | 0.731 | 0.288-1.859  | 0.158 |           |             |       |
| No                    | 7  | 28.6 | 13.0 |       |             |       |           |             |       | 28.6 | 21.0 |       |              |       |           |             |       |
| Yes                   | 63 | 25.4 | 17.9 |       |             |       |           |             |       | 36.6 | 42.6 |       |              |       |           |             |       |
| Procedure             |    |      |      | 1.203 | 0.660-2.193 | 0.546 |           |             |       |      |      | 0.934 | 0.481-1.816  | 0.841 |           |             |       |
| PD, TP                | 51 | 24.5 | 15.2 |       |             |       |           |             |       | 34.7 | 38.1 |       |              |       |           |             |       |
| DP                    | 19 | 21.1 | 12.7 |       |             |       |           |             |       | 36.1 | 43.5 |       |              |       |           |             |       |
| Portal vein resection |    |      |      | 1.104 | 0.519-2.350 | 0.797 |           |             |       |      |      | 0.942 | 0.371-2.393  | 0.900 |           |             |       |

|                                    |    |      |      |       |                 |       |  |  |  |      |      |       |                 |       |  |  |  |
|------------------------------------|----|------|------|-------|-----------------|-------|--|--|--|------|------|-------|-----------------|-------|--|--|--|
| No                                 | 61 | 26.3 | 12.7 |       |                 |       |  |  |  | 34.4 | 41.6 |       |                 |       |  |  |  |
| Yes                                | 9  | 0.0  | 17.9 |       |                 |       |  |  |  | 41.7 | 33.0 |       |                 |       |  |  |  |
| Operation time,<br>min             |    |      |      | 1.457 | 0.843-<br>2.518 | 0.174 |  |  |  |      |      | 1.399 | 0.773-<br>2.533 | 0.265 |  |  |  |
| <310                               | 36 | 31.4 | 18.5 |       |                 |       |  |  |  | 39.7 | 43.5 |       |                 |       |  |  |  |
| ≥310                               | 34 | 15.1 | 12.4 |       |                 |       |  |  |  | 30.0 | 32.1 |       |                 |       |  |  |  |
| Anesthesia time,<br>min            |    |      |      | 1.205 | 0.698-<br>2.080 | 0.503 |  |  |  |      |      | 1.204 | 0.666-<br>2.177 | 0.539 |  |  |  |
| <374                               | 35 | 29.4 | 17.9 |       |                 |       |  |  |  | 38.3 | 42.6 |       |                 |       |  |  |  |
| ≥374                               | 35 | 16.8 | 13.0 |       |                 |       |  |  |  | 31.8 | 38.1 |       |                 |       |  |  |  |
| Intraoperative<br>blood loss, ml   |    |      |      | 1.604 | 0.915-<br>2.811 | 0.095 |  |  |  |      |      | 1.489 | 0.821-<br>2.701 | 0.187 |  |  |  |
| <728                               | 35 | 34.6 | 17.9 |       |                 |       |  |  |  | 42.7 | 43.5 |       |                 |       |  |  |  |
| ≥728                               | 35 | 12.0 | 15.2 |       |                 |       |  |  |  | 26.7 | 36.5 |       |                 |       |  |  |  |
| ANH                                |    |      |      | 1.585 | 0.915-<br>2.745 | 0.097 |  |  |  |      |      | 1.654 | 0.908-<br>3.011 | 0.097 |  |  |  |
| No                                 | 35 | 30.1 | 18.1 |       |                 |       |  |  |  | 44.6 | 50.5 |       |                 |       |  |  |  |
| Yes                                | 35 | 17.2 | 12.1 |       |                 |       |  |  |  | 24.8 | 32.1 |       |                 |       |  |  |  |
| Intraoperative<br>fluid given, ml  |    |      |      | 1.444 | 0.837-<br>2.492 | 0.183 |  |  |  |      |      | 1.524 | 0.842-<br>2.758 | 0.161 |  |  |  |
| <3700                              | 39 | 28.7 | 18.1 |       |                 |       |  |  |  | 39.7 | 44.4 |       |                 |       |  |  |  |
| ≥3700                              | 31 | 13.8 | 12.1 |       |                 |       |  |  |  | 29.5 | 33.0 |       |                 |       |  |  |  |
| Intraoperative<br>urine output, ml |    |      |      | 1.218 | 0.704-<br>2.109 | 0.480 |  |  |  |      |      | 1.246 | 0.688-<br>2.259 | 0.467 |  |  |  |
| <500                               | 40 | 25.4 | 18.1 |       |                 |       |  |  |  | 39.0 | 42.6 |       |                 |       |  |  |  |
| ≥500                               | 30 | 21.4 | 12.1 |       |                 |       |  |  |  | 29.2 | 38.1 |       |                 |       |  |  |  |
| Total in-out<br>balance, ml        |    |      |      | 1.231 | 0.714-<br>2.123 | 0.452 |  |  |  |      |      | 1.394 | 0.770-<br>2.522 | 0.270 |  |  |  |
| <2368                              | 35 | 25.7 | 18.1 |       |                 |       |  |  |  | 36.7 | 43.5 |       |                 |       |  |  |  |

|                                   |    |      |      |       |             |       |  |  |  |      |      |       |             |       |       |             |       |
|-----------------------------------|----|------|------|-------|-------------|-------|--|--|--|------|------|-------|-------------|-------|-------|-------------|-------|
| ≥2368                             | 35 | 20.1 | 13.0 |       |             |       |  |  |  | 34.6 | 32.1 |       |             |       |       |             |       |
| Total in-out balance, ml/kg/h     |    |      |      | 1.038 | 0.601-1.794 | 0.893 |  |  |  |      |      | 1.091 | 0.603-1.971 | 0.774 |       |             |       |
| <6.5                              | 36 | 21.6 | 15.2 |       |             |       |  |  |  | 33.5 | 43.5 |       |             |       |       |             |       |
| ≥6.5                              | 34 | 24.5 | 12.3 |       |             |       |  |  |  | 37.4 | 36.5 |       |             |       |       |             |       |
| Postoperative complications       |    |      |      | 1.169 | 0.586-2.333 | 0.658 |  |  |  |      |      | 1.311 | 0.646-2.661 | 0.452 |       |             |       |
| Clavien-Dindo grade 0-2           | 57 | 23.2 | 17.9 |       |             |       |  |  |  | 38.6 | 38.1 |       |             |       |       |             |       |
| Clavien-Dindo grade ≥3            | 13 | 23.1 | 12.4 |       |             |       |  |  |  | 23.1 | 43.5 |       |             |       |       |             |       |
| Pancreatic fistula                |    |      |      | 0.966 | 0.454-2.053 | 0.927 |  |  |  |      |      | 1.151 | 0.533-2.483 | 0.721 |       |             |       |
| ISGPF grade non-A                 | 59 | 22.4 | 17.9 |       |             |       |  |  |  | 37.2 | 38.1 |       |             |       |       |             |       |
| ISGPF grade B-C                   | 11 | 27.3 | 15.2 |       |             |       |  |  |  | 27.3 | 44.4 |       |             |       |       |             |       |
| Postoperative hospital stay, days |    |      |      | 0.851 | 0.494-1.468 | 0.561 |  |  |  |      |      | 0.974 | 0.539-1.759 | 0.929 |       |             |       |
| <17                               | 36 | 19.6 | 12.7 |       |             |       |  |  |  | 37.0 | 33.0 |       |             |       |       |             |       |
| ≥17                               | 34 | 26.5 | 15.2 |       |             |       |  |  |  | 33.7 | 42.6 |       |             |       |       |             |       |
| Adjuvant chemotherapy             |    |      |      | 0.604 | 0.325-1.018 | 0.060 |  |  |  |      |      | 0.392 | 0.206-0.744 | 0.007 | 0.230 | 0.099-0.537 | 0.001 |
| No                                | 16 | 13.3 | 9.8  |       |             |       |  |  |  | 13.3 | 21.0 |       |             |       |       |             |       |
| Yes                               | 54 | 27.2 | 18.5 |       |             |       |  |  |  | 42.4 | 44.4 |       |             |       |       |             |       |

<sup>a</sup>All of the patients were diagnosed with M1 due to positive lymph nodes other than the regional lymph nodes. P-values were obtained using Cox regression analysis. ALT, alanine aminotransferase; ANH, acute normovolemic hemodilution; AST, aspartate aminotransferase; CA19-9, carbohydrate antigen 19-9; CEA, carcinoembryonic antigen; CRP, C-reactive protein; DP, distal pancreatectomy; DSS, disease-specific survival; ISGPF, International Study Group of Pancreatic Fistula; MST, median survival time; PD, pancreatoduodenectomy; RFS, recurrence-free survival; RR, relative risk; TP, total pancreatectomy; UICC, Union for International Cancer Control.
